# Supplementary material for: Structure and transport mechanism of the sodium/proton antiporter MjNhaP1
Source: eLife journal article supplement (doi:10.7554/elife.03583), 2014-11-17
Supplement: supp [file elife-03583-supp-v2.zip]

Archive with 12 entries (12 files):
- elife_poa_e03583_Figure_5_figure_supplement_1.pdf
- elife_poa_e03583_Figure_2_figure_supplement_3.pdf
- elife_poa_e03583_Figure_3_figure_supplement_2.pdf
- elife_poa_e03583_Figure_2_figure_supplement_1.pdf
- elife_poa_e03583_Video_2.mp4
- elife_poa_e03583_Figure_9_figure_supplement_1.pdf
- elife_poa_e03583_Video_3.mp4
- elife_poa_e03583_Figure_2_figure_supplement_2.pdf
- elife_poa_e03583_Figure_6_figure_supplement_1.pdf
- elife_poa_e03583_Figure_2_figure_supplement_4.pdf
- elife_poa_e03583_Video_1.mp4
- elife_poa_e03583_Figure_3_figure_supplement_1.pdf
