# Supplementary figures and images for: Structure and transport mechanism of the sodium/proton antiporter MjNhaP1
Source: eLife journal article supplement (doi:10.7554/elife.03583), 2014-11-17

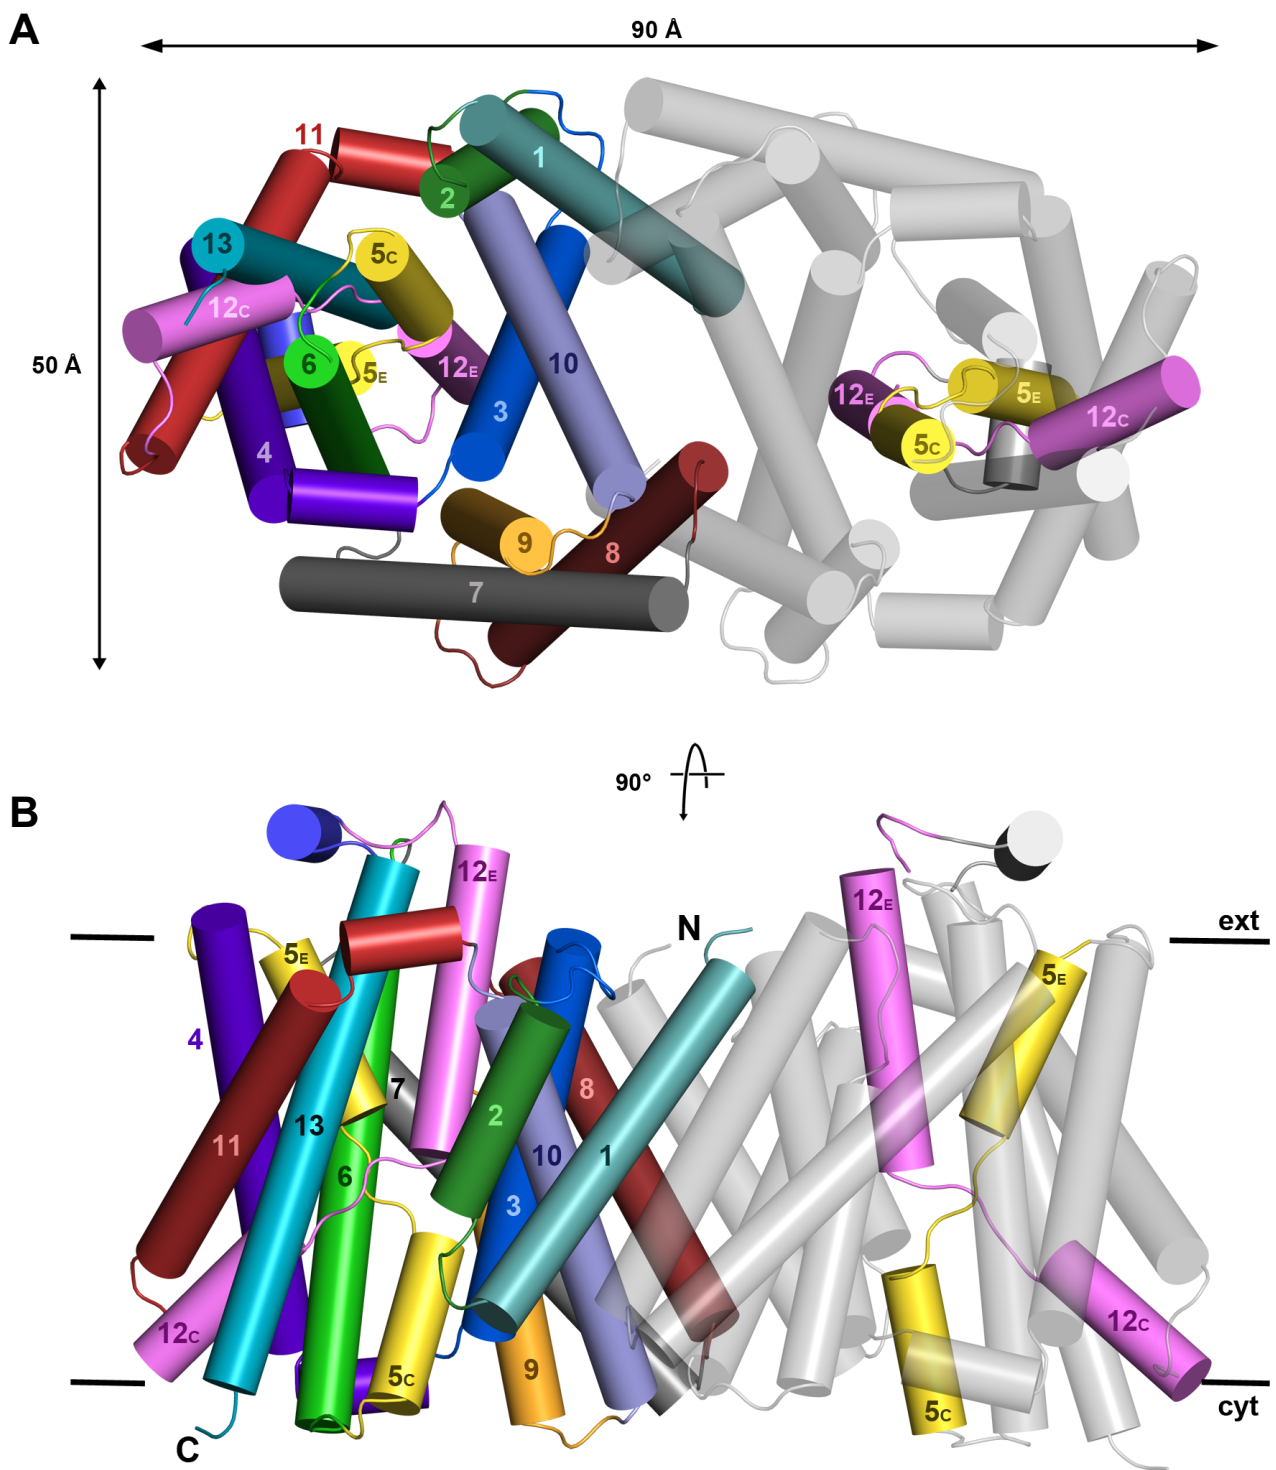

Figure 2 - figure supplement 1

Supplement: supp [file elife_poa_e03583_Figure_2_figure_supplement_1.pdf › elife_poa_e03583_Figure_2_figure_supplement_1.pdf]

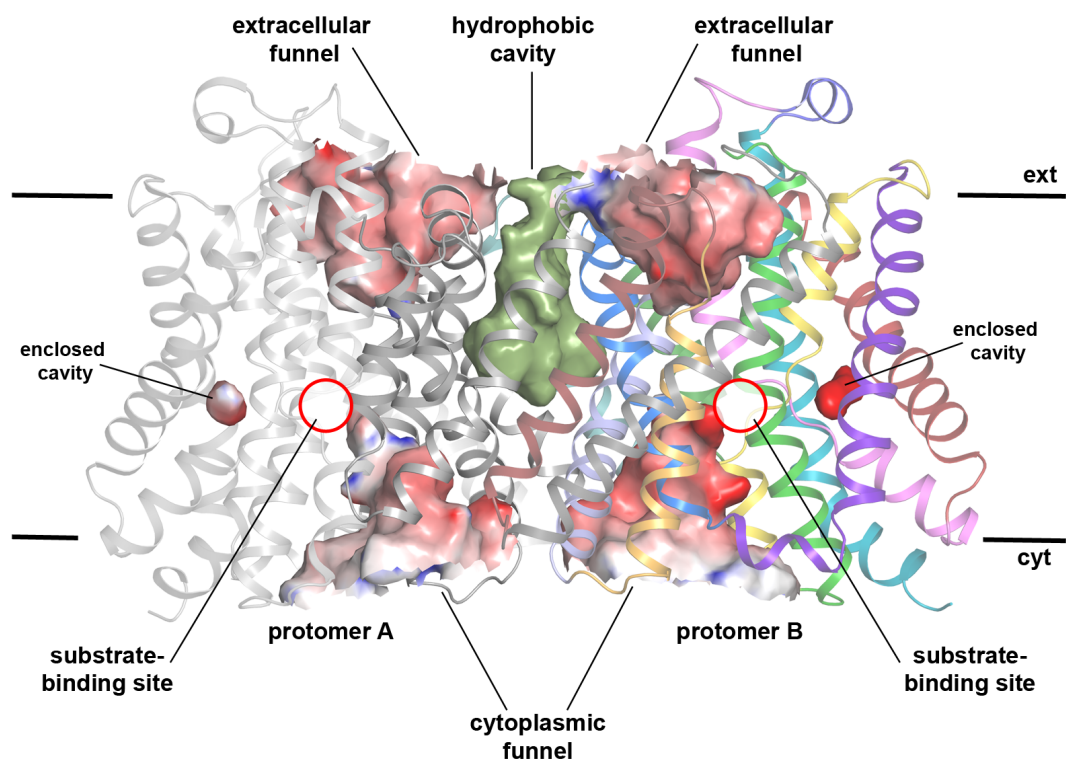

Figure 2 - figure supplement 2

Supplement: supp [file elife_poa_e03583_Figure_2_figure_supplement_2.pdf › elife_poa_e03583_Figure_2_figure_supplement_2.pdf]

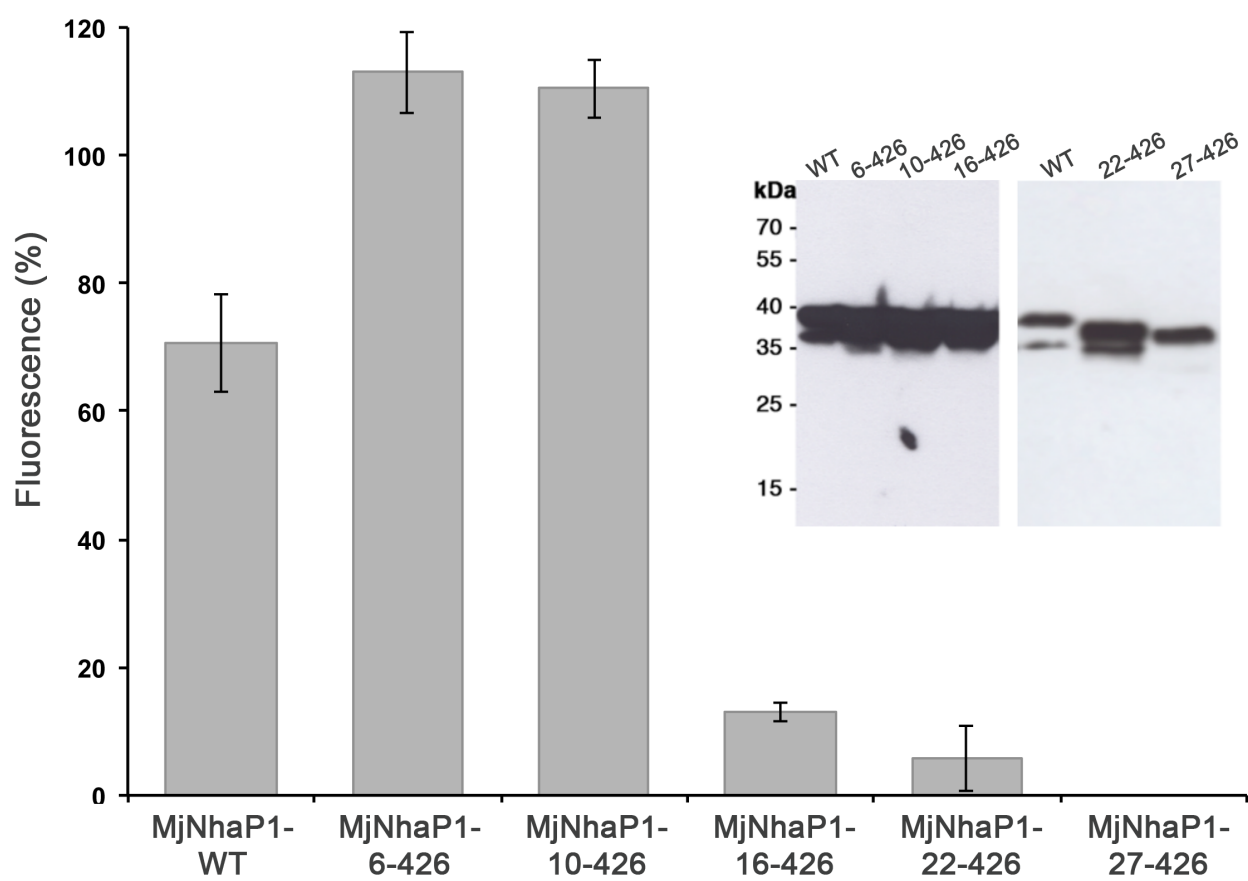

Figure 2 - figure supplement 3

Supplement: supp [file elife_poa_e03583_Figure_2_figure_supplement_3.pdf › elife_poa_e03583_Figure_2_figure_supplement_3.pdf]

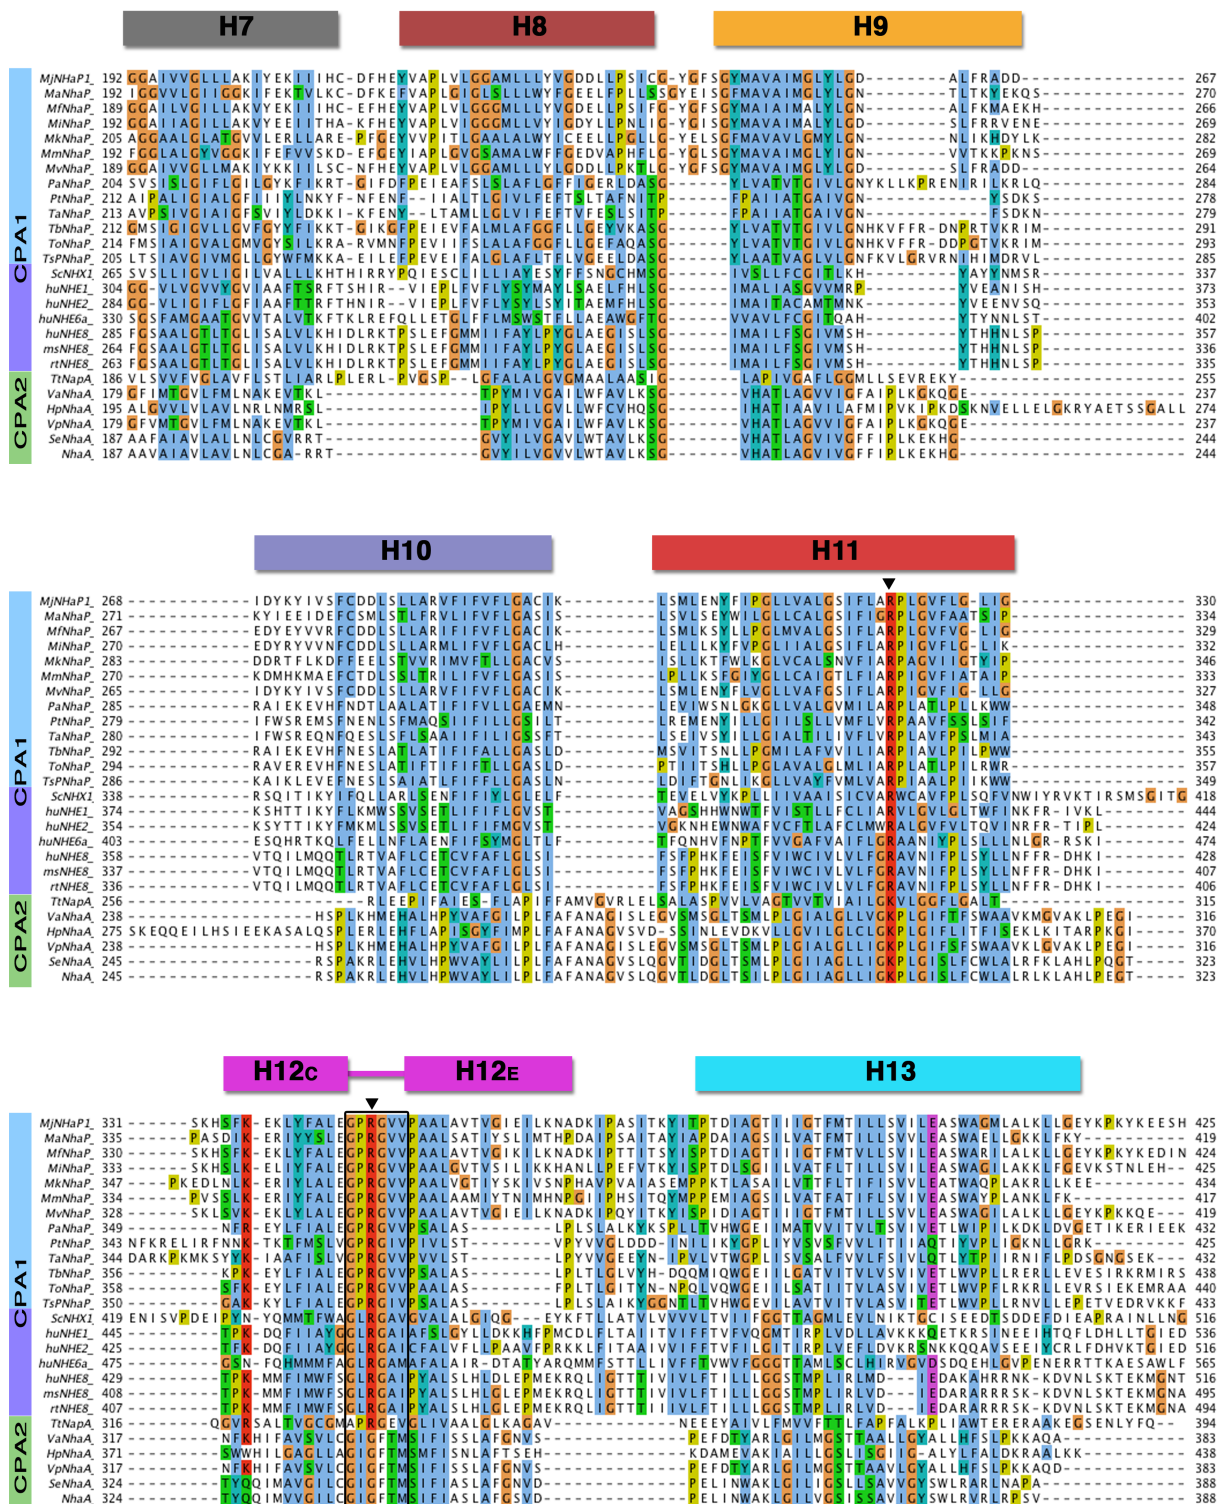

Figure 2 - figure supplement 4

Supplement: supp [file elife_poa_e03583_Figure_2_figure_supplement_4.pdf › elife_poa_e03583_Figure_2_figure_supplement_4.pdf]

# CPA1

MjNhaP1  
(4czb)

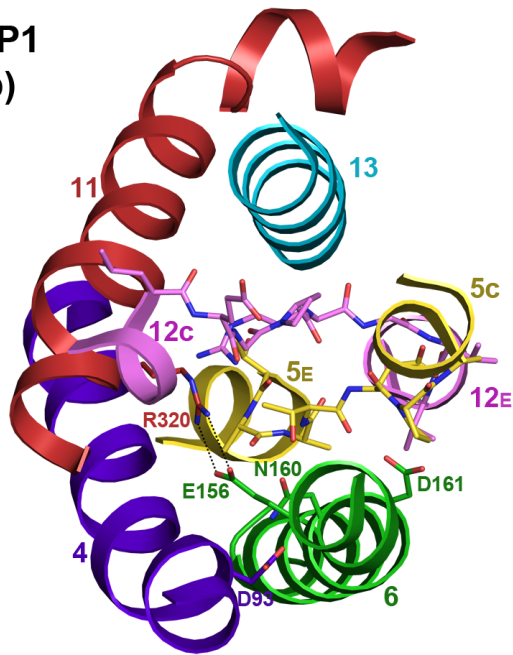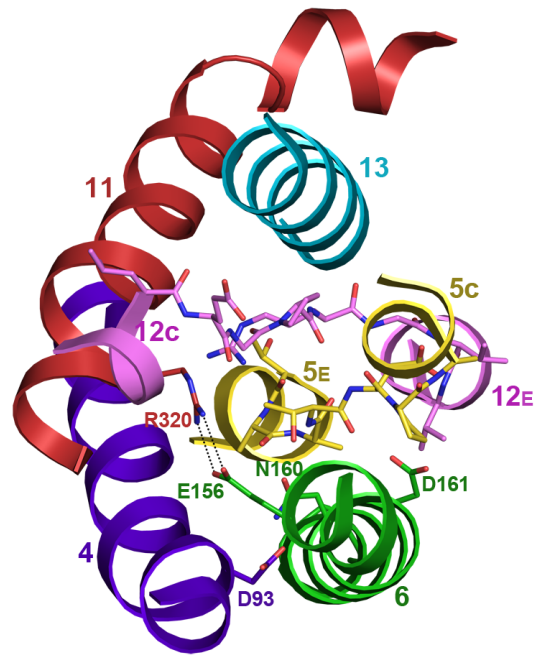

PaNhaP  
(4cza)

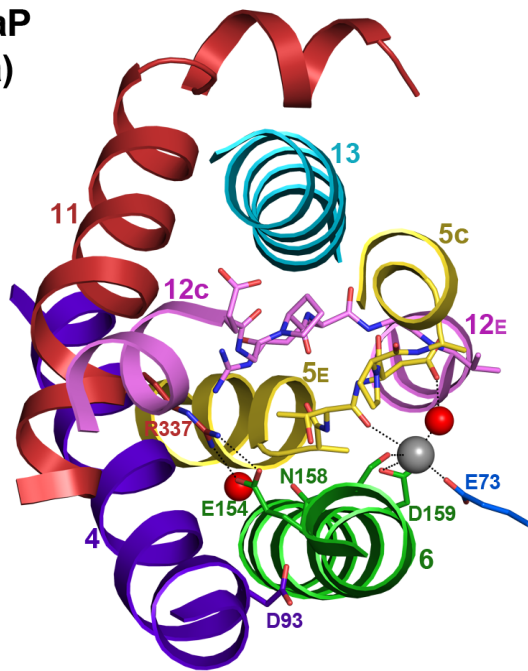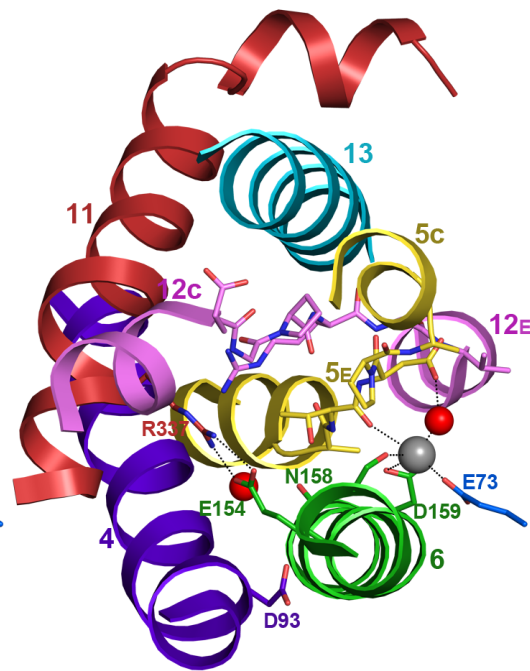

Figure 3 - figure supplement 1

Supplement: supp [file elife_poa_e03583_Figure_3_figure_supplement_1.pdf › elife_poa_e03583_Figure_3_figure_supplement_1.pdf]

## CPA2

EcNhaA  
(1zcd)

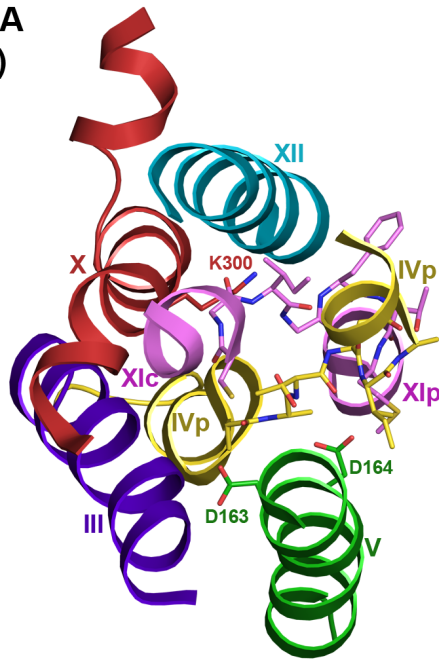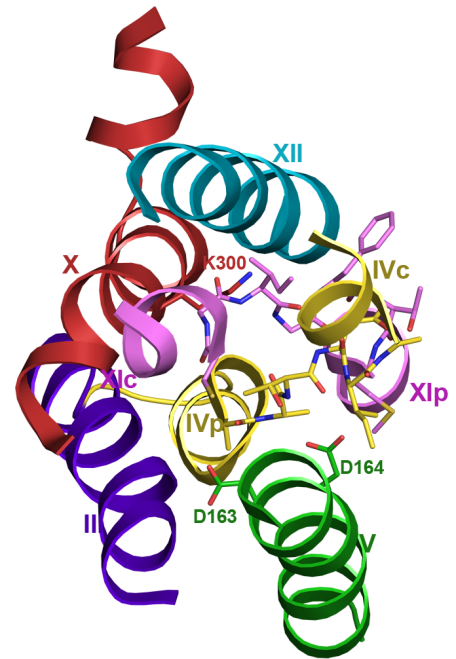

EcNhaA  
(4au5)

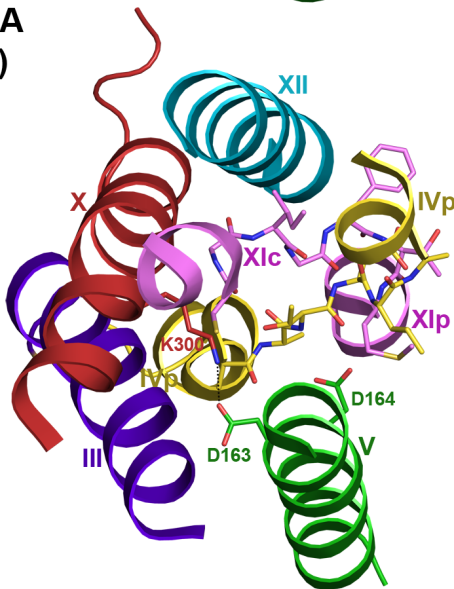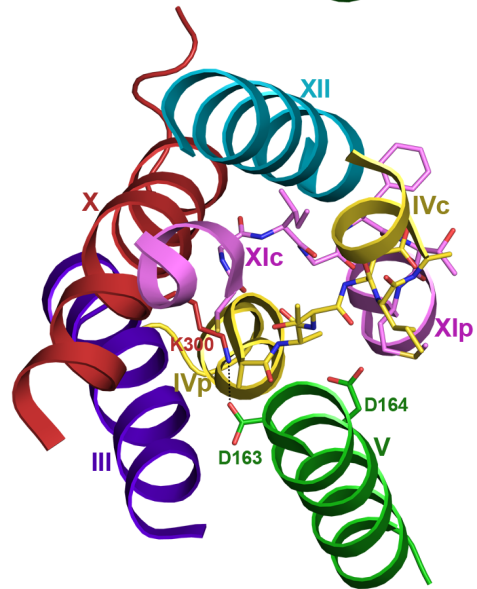

TtNapA  
(4bwz)

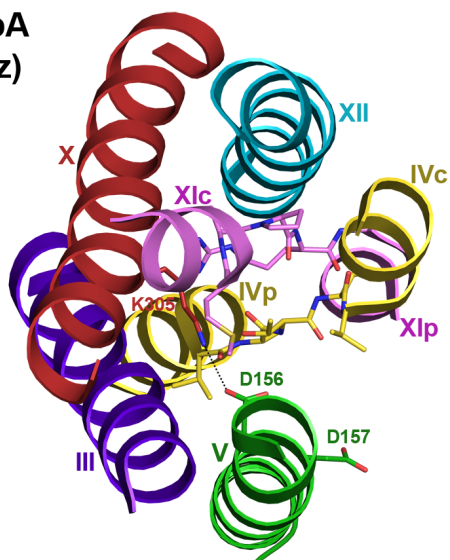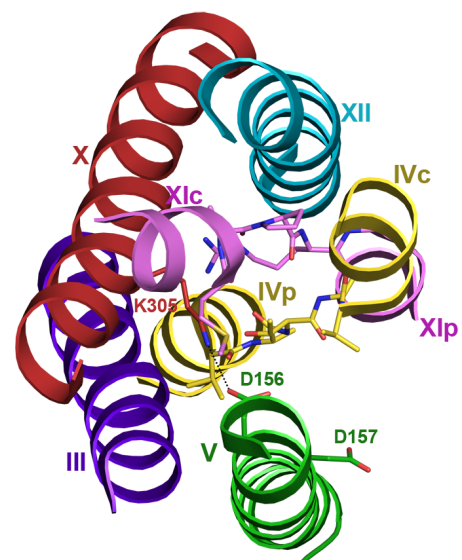

Figure 3 - figure supplement 2

Supplement: supp [file elife_poa_e03583_Figure_3_figure_supplement_2.pdf › elife_poa_e03583_Figure_3_figure_supplement_2.pdf]

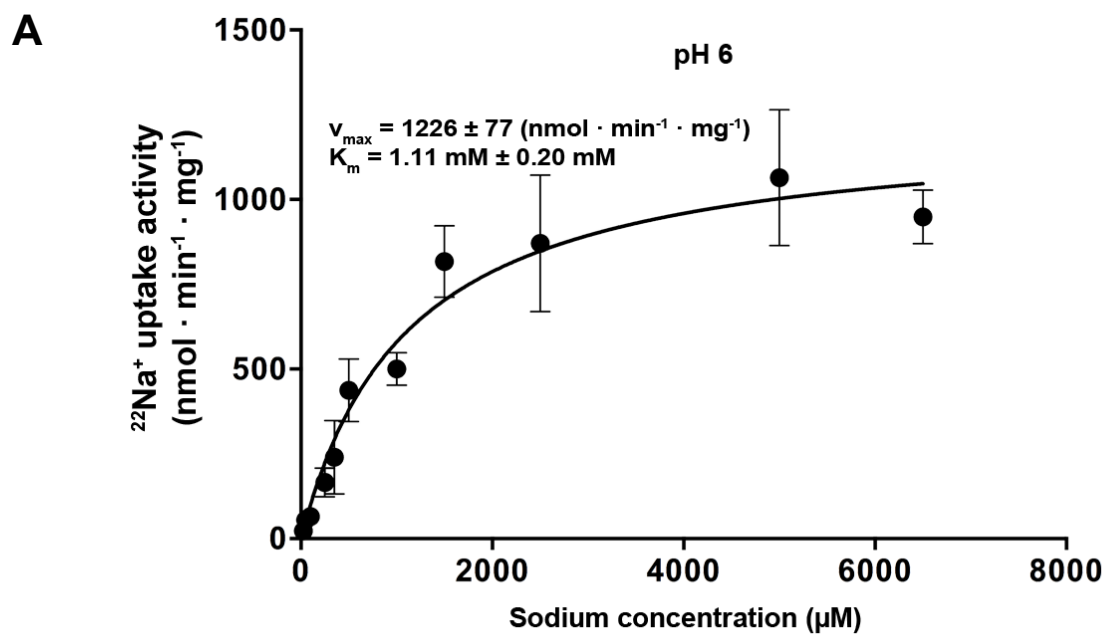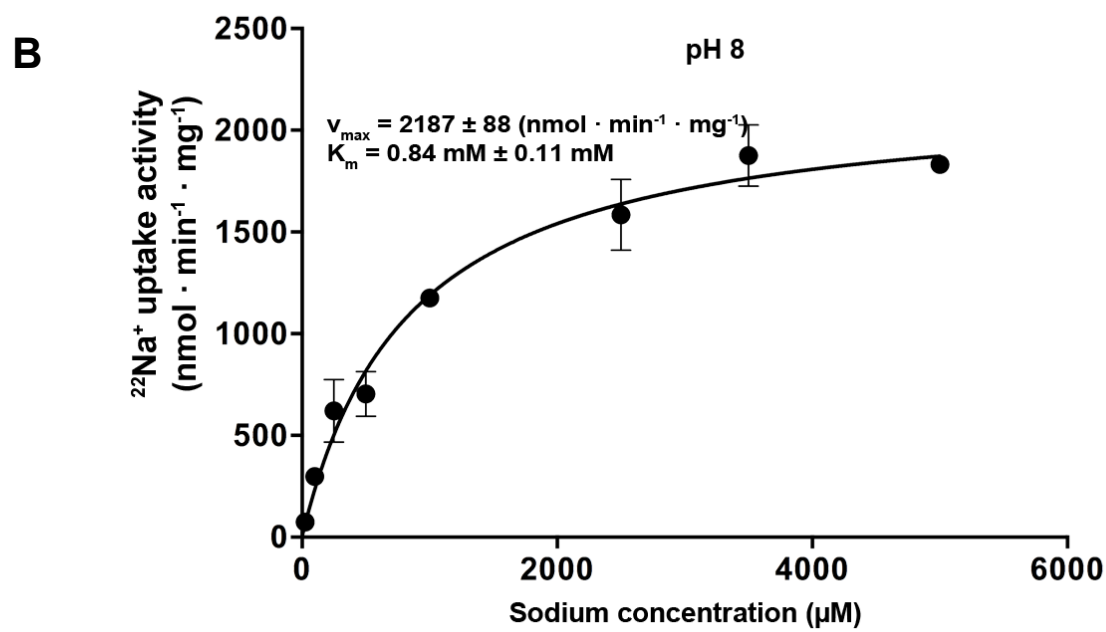

Figure 5 - figure supplement 1

Supplement: supp [file elife_poa_e03583_Figure_5_figure_supplement_1.pdf › elife_poa_e03583_Figure_5_figure_supplement_1.pdf]

A

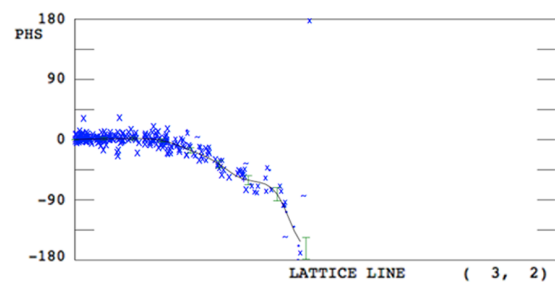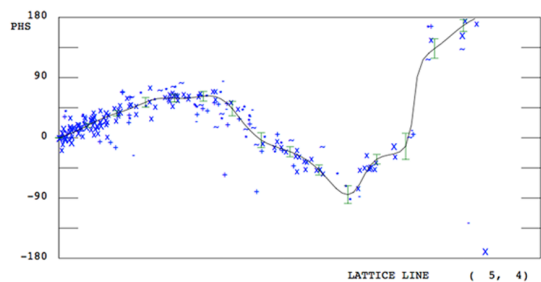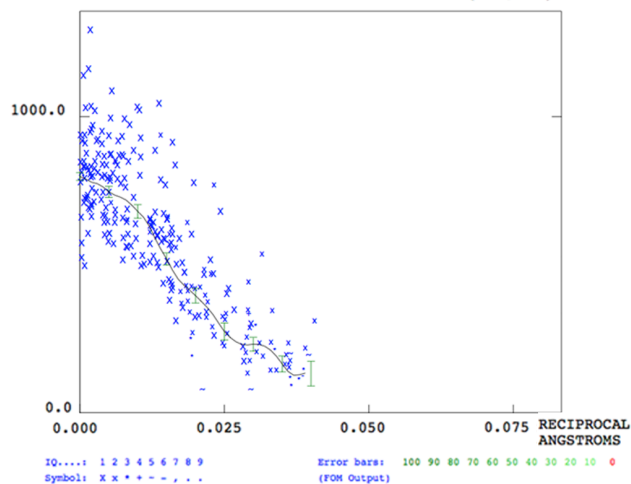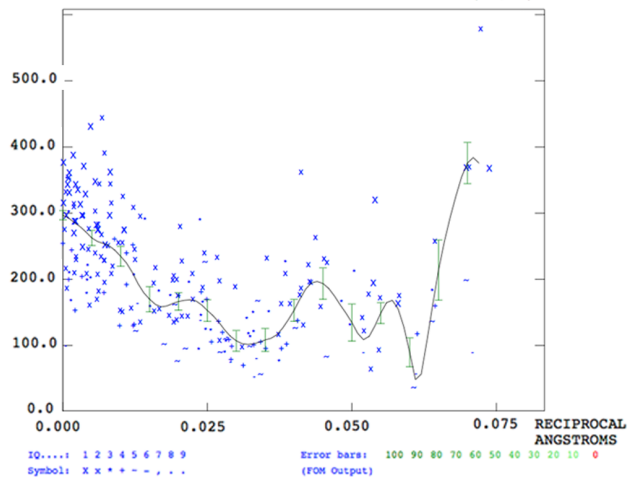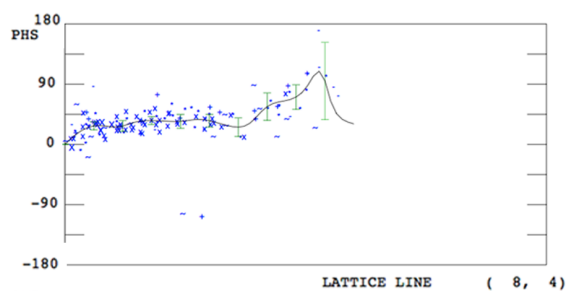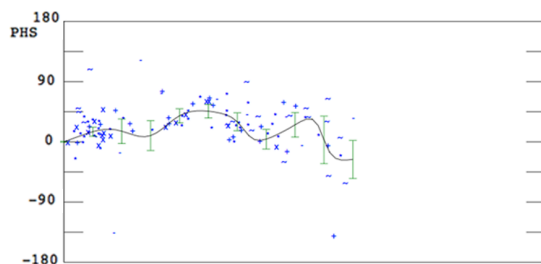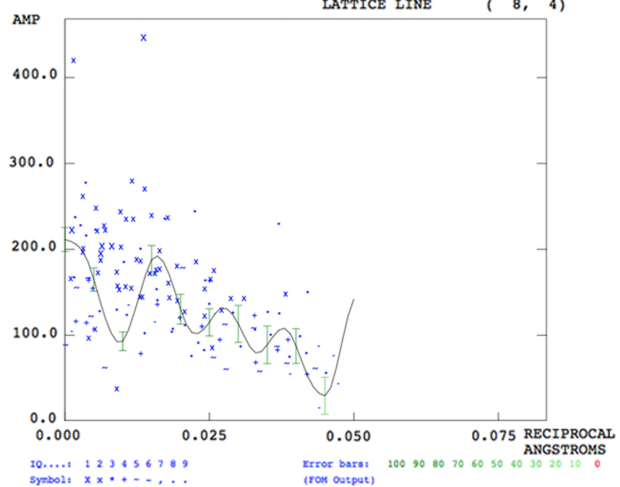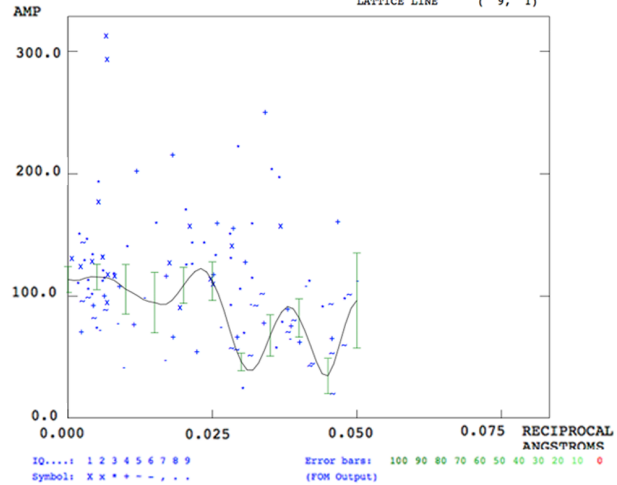

**B**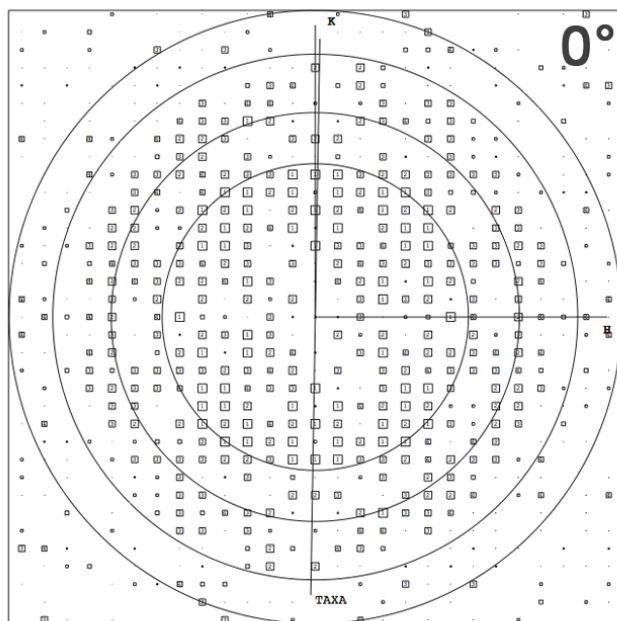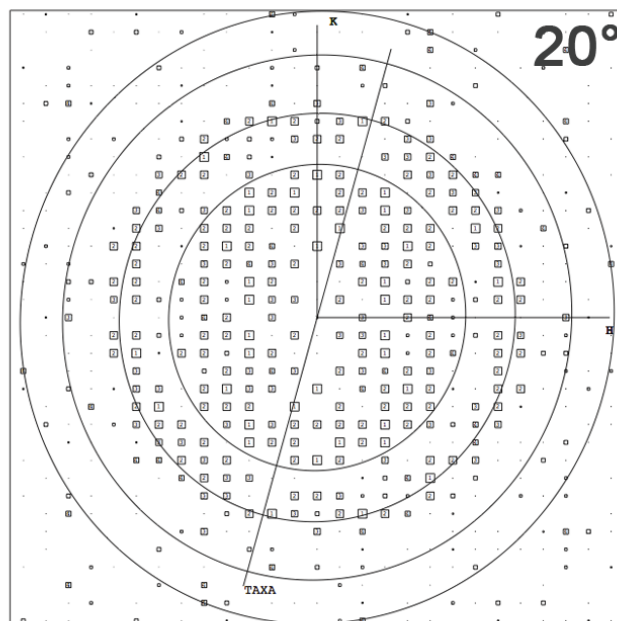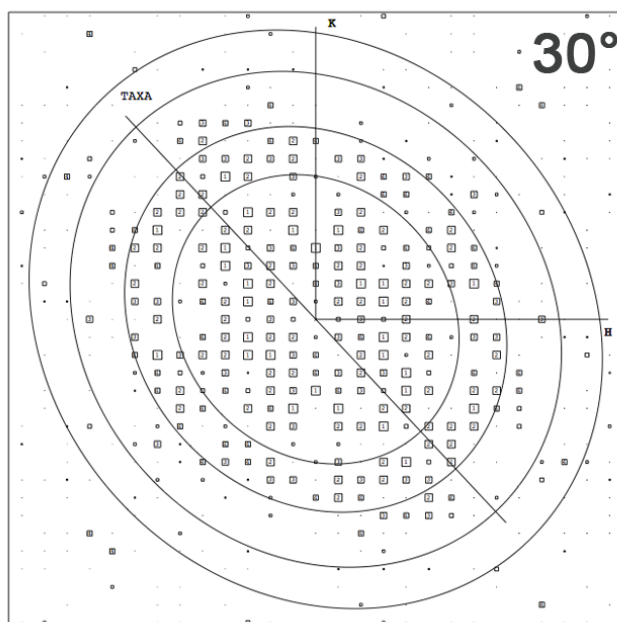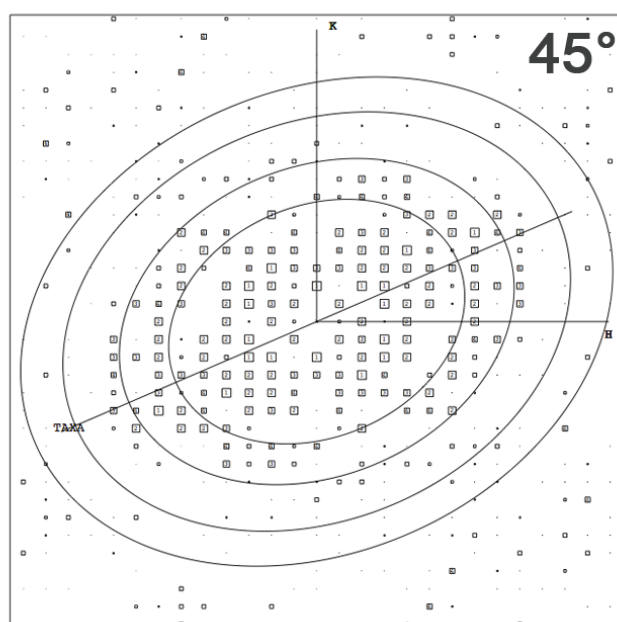

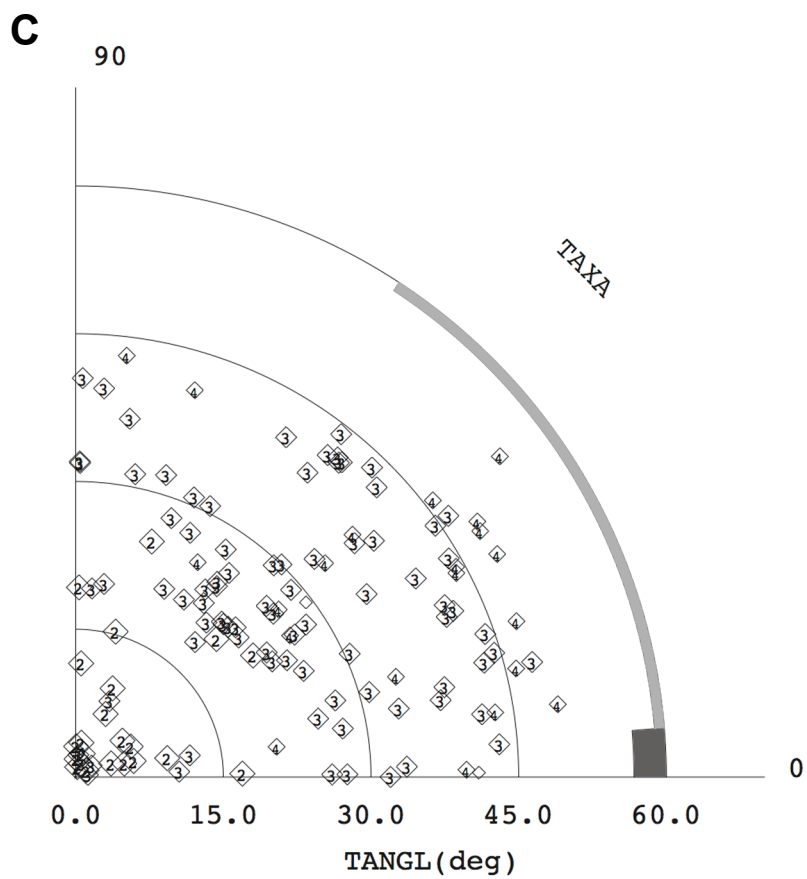

**Figure 6 - figure supplement 1**

Supplement: supp [file elife_poa_e03583_Figure_6_figure_supplement_1.pdf › elife_poa_e03583_Figure_6_figure_supplement_1.pdf]

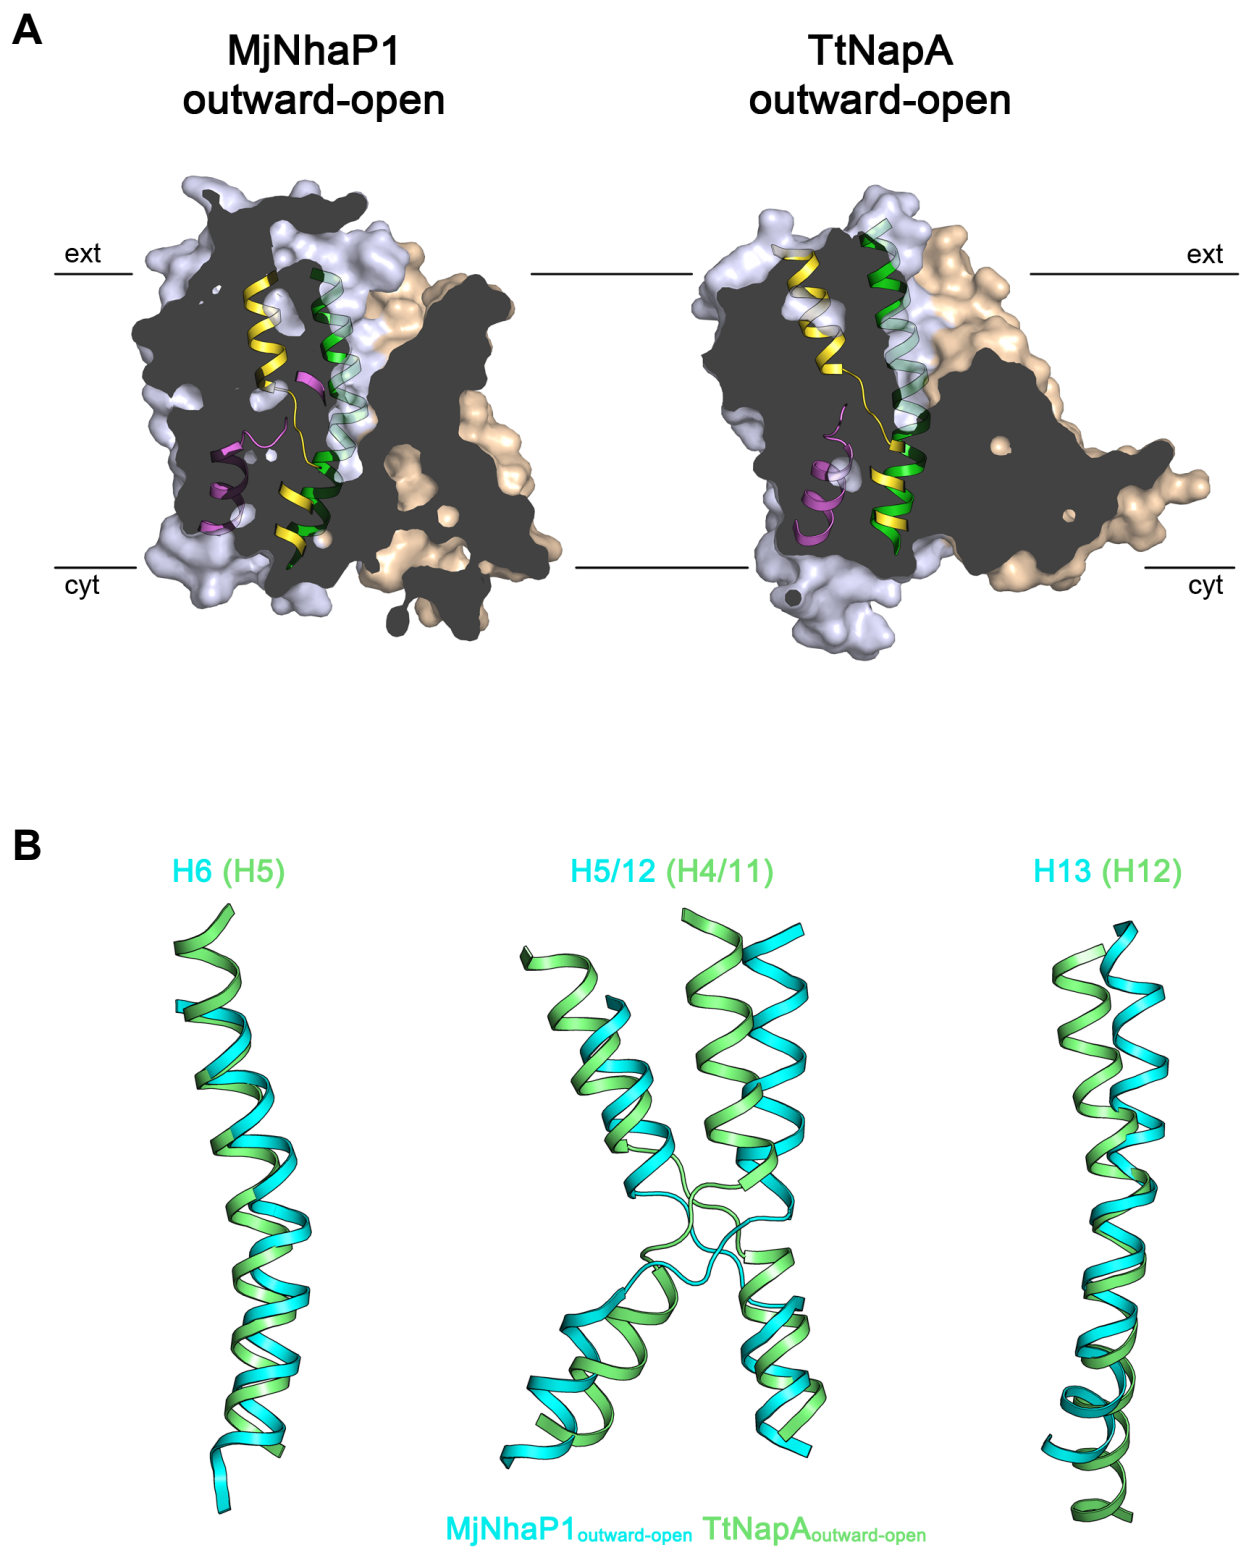

Figure 9 - figure supplement 1

Supplement: supp [file elife_poa_e03583_Figure_9_figure_supplement_1.pdf › elife_poa_e03583_Figure_9_figure_supplement_1.pdf]
